# Supplementary material for: Aminopolymer functionalization of boron nitride nanosheets for highly efficient capture of carbon dioxide
Source: Royal Society of Chemistry journal article supplement (doi:10.1039/c7ta00644f), 2017-01-01
Supplement: c7ta00644f1.pdf [file c7ta00644f1.pdf]

Electronic Supplementary Information

# **Aminopolymer Functionalization of Boron Nitride Nanosheets for Highly Efficient Capture of Carbon Dioxide**

Kuan Huang,<sup>a,b</sup> Liangbo Liang,<sup>c</sup> Songhai Chai,<sup>b</sup> Uma Tumuluri,<sup>d</sup> Meijun Li,<sup>b</sup> Zili Wu,<sup>c,d</sup> Bobby Sumpter,<sup>c,e\*</sup> Sheng Dai<sup>b,d\*</sup>

<sup>a</sup>Key Laboratory of Poyang Lake Environment and Resource Utilization of Ministry of Education, School of Resources Environmental and Chemical Engineering, Nanchang University, Nanchang, Jiangxi 330031, P. R. China.

<sup>b</sup>Department of Chemistry, University of Tennessee, Knoxville, TN 37996, USA.

<sup>c</sup>Center for Nanophase Materials Sciences, Oak Ridge National Laboratory, Oak Ridge, TN 37831, USA; E-mail: [sumpterbg@ornl.gov](mailto:sumpterbg@ornl.gov).

<sup>d</sup>Chemical Sciences Division, Oak Ridge National Laboratory, Oak Ridge, TN 37831, USA; E-mails: [dais@ornl.gov](mailto:dais@ornl.gov).

<sup>e</sup>Computer Science & Mathematics Division, Oak Ridge National Laboratory, Oak Ridge, TN 37831, USA.

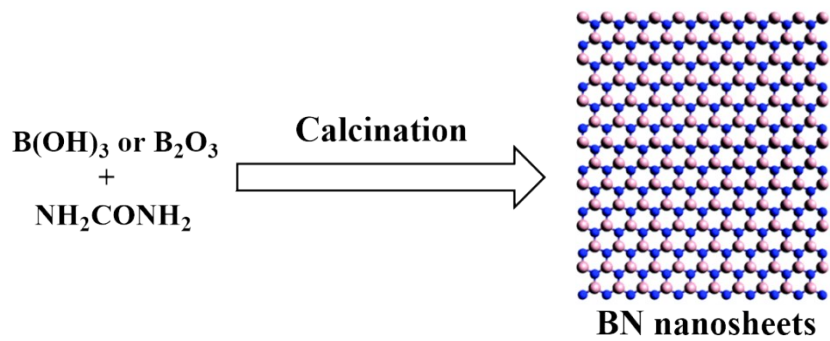

Fig. S1 Synthetic route for BN nanosheets.

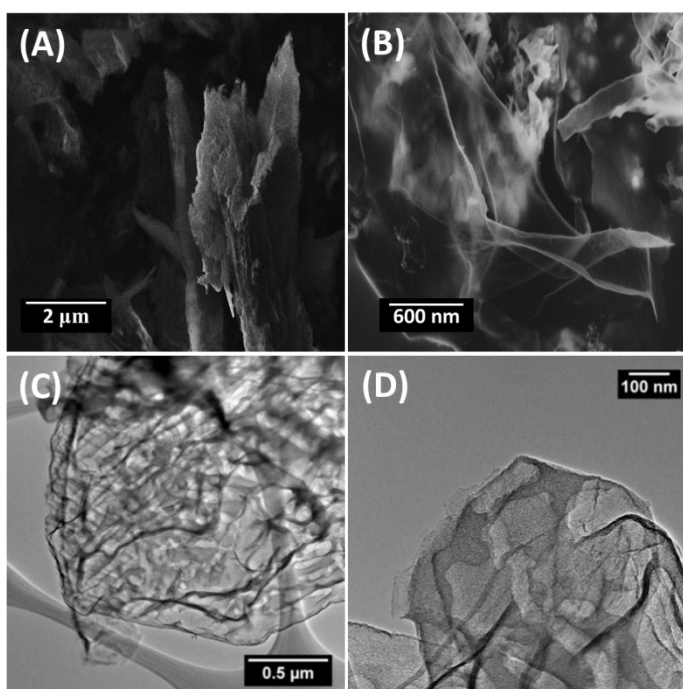

Fig. S2 SEM (A,B) and TEM (C,D) images of BN.

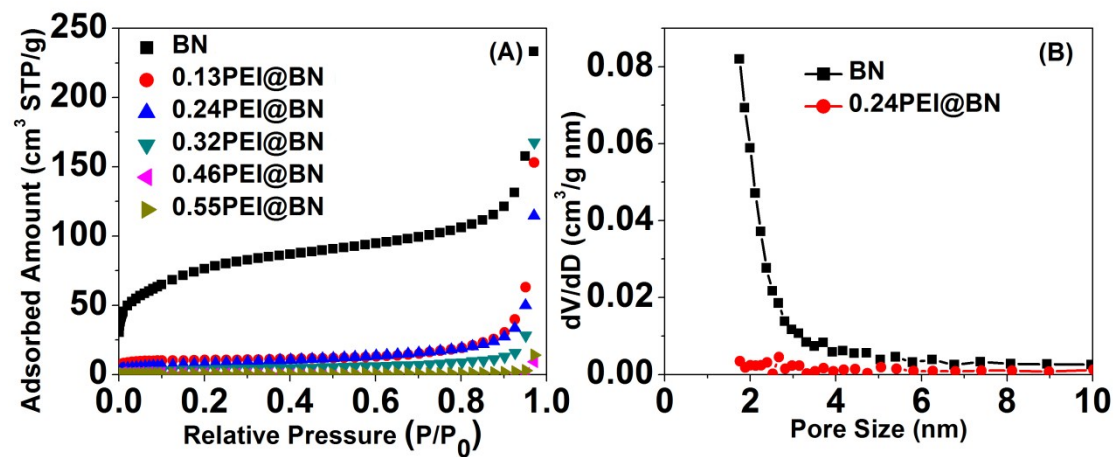

**Fig. S3** N<sub>2</sub> adsorption isotherms at -196 °C (A) and BJH pore size distributions (B) of BN and PEI@BN samples.

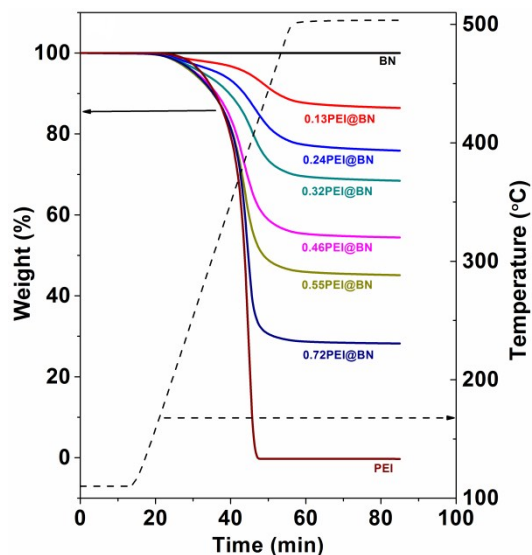

**Fig. S4** TG profiles of PEI, BN and PEI@BN samples.

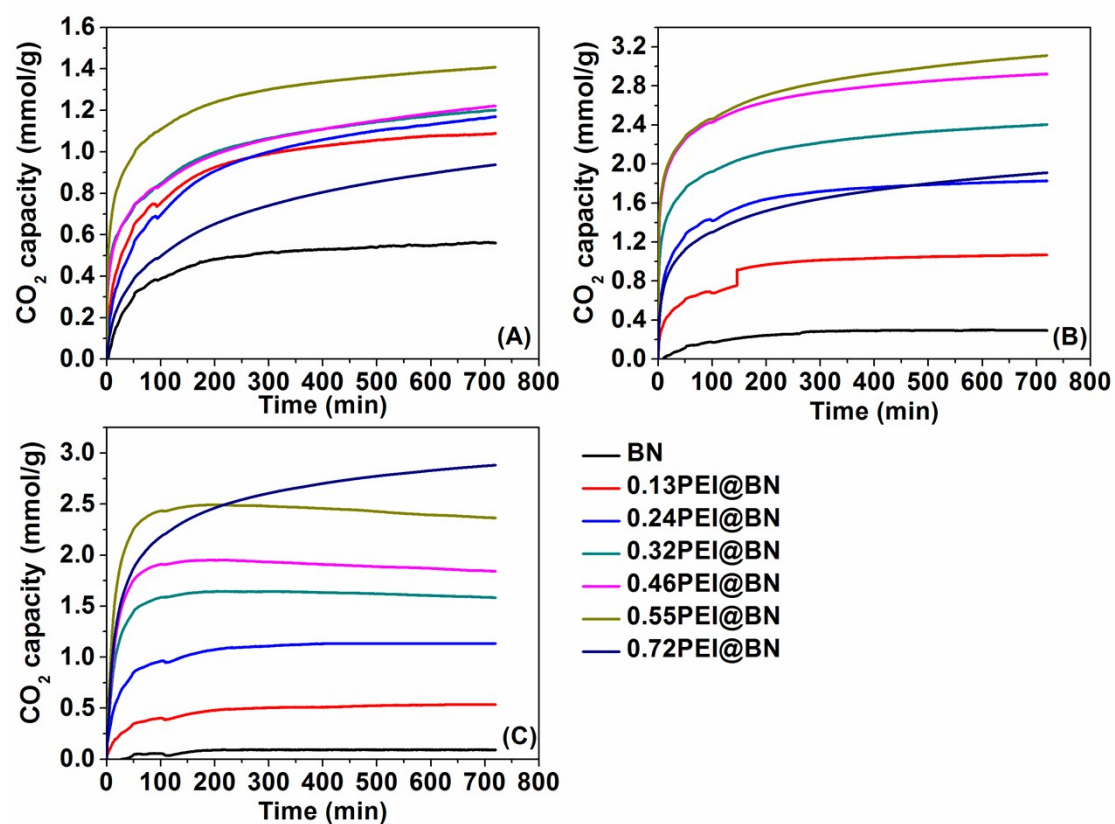

**Fig. S5** TG profiles of CO<sub>2</sub> adsorption on BN and PEI@BN samples at 30 °C (A), 75 °C (B) and 120 °C (C) (conditions: pure CO<sub>2</sub>, 50 mL/min, 12 h).

**Table S1.** Comparison of BN with mesoporous silicas for aminopolymer functionalizaion

| Adsorbents                 | PEI loading (wt. %) | $S_{\text{BET}}^{\text{a}}$ ( $\text{m}^2/\text{g}$ ) | $V_{\text{t}}^{\text{b}}$ ( $\text{cm}^3/\text{g}$ ) | $\text{CO}_2$ capacity <sup>c</sup> ( $\text{mmol}/\text{g}$ ) |
|----------------------------|---------------------|-------------------------------------------------------|------------------------------------------------------|----------------------------------------------------------------|
| BN                         | -                   | 280                                                   | 0.24                                                 | -                                                              |
| 0.55PEI@BN                 | 54.9                | 3                                                     | 0.01                                                 | 3.12                                                           |
| SBA-15 <sup>d</sup>        | -                   | 753                                                   | 0.94                                                 | -                                                              |
| 0.5PEI@SBA-15 <sup>d</sup> | ~50                 | 13                                                    | 0.04                                                 | 2.89                                                           |
| MCM-41 <sup>d</sup>        | -                   | 1042                                                  | 0.85                                                 | -                                                              |
| 0.5PEI@MCM-41 <sup>d</sup> | ~50                 | 4                                                     | 0.01                                                 | 2.52                                                           |
| KIT-6 <sup>d</sup>         | -                   | 895                                                   | 1.22                                                 | -                                                              |
| 0.5PEI@KIT-6 <sup>d</sup>  | ~50                 | 86                                                    | 0.18                                                 | 3.07                                                           |

a: BET surface area; b: total pore volume; c: determined at 75 °C; d: cited from reference 33.

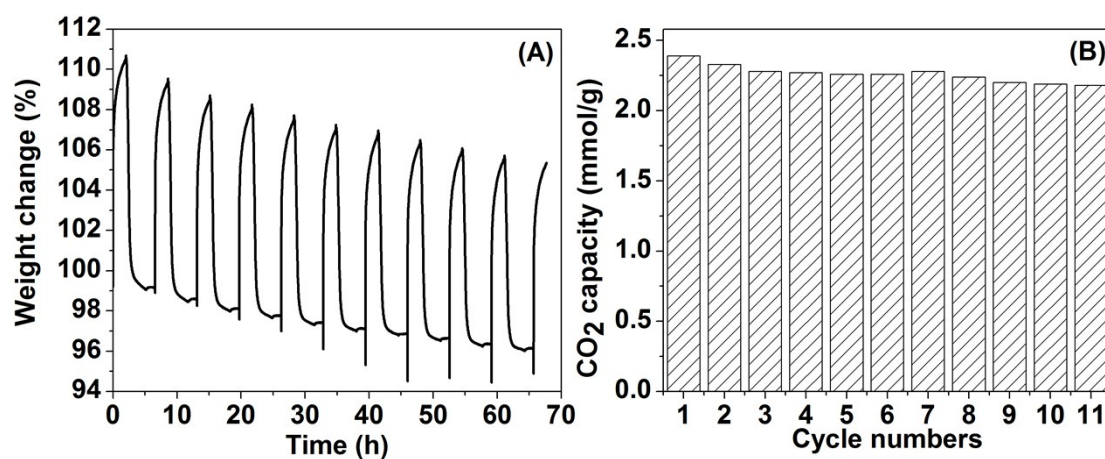

**Fig. S6.** Recycle 0.55PEI@BN at 110 °C (A: TG profiles, B: CO<sub>2</sub> capacities)
